1 **Cardiorespiratory demands of firearms training instruction and 15m shuttle tests in law**  
2 **enforcement.**

3

4 Warwick. J.,<sup>1</sup> Cooper. S.,<sup>1</sup> Ronca. F.,<sup>1</sup>

5

6 Author affiliation:

7 1 – University College London, London, UK

8

9 Corresponding Author:

10 Mr Joseph Warwick

11 170 Tottenham Court Road

12 Institute of Sport Health and Exercise,

13 University College London,

14 London,

15 W1T 7HA.

16 Email – [Joseph.warwick.18@ucl.ac.uk](mailto:Joseph.warwick.18@ucl.ac.uk)

17

18 Word Count (ex. Abstract, strength and limitation, tables, figure legends, acknowledgements, funding  
19 statement, author contributions, data availability statement & references) – 3794

20 Number of tables – 3

21 Number of figures – 2

22

23 *Author contributions:*

24 Mr J. Warwick – Conception and design of protocol, acquisition of data, interpretation of  
25 data, drafting and revising of work critically for important intellectual content. Final  
26 approval of version to be published. Agreement to be accountable for all aspects of the  
27 work in ensuring that questions related to the accuracy or integrity of any part of the work  
28 are appropriately investigated and resolved.

29 Miss S Cooper - Acquisition of data, analysis of data, revision of work critically for important  
30 intellectual content. Final approval of version to be published.

31 Assoc Prof Dr F. Ronca – Interpretation of data, revising of work critically for important  
32 intellectual content. Final approval of the version to be published.

NOTE: This preprint reports new research that has not been certified by peer review and should not be used to guide clinical practice.

33

### Abstract

34 **Objectives:** Law enforcement agencies require minimum fitness standards to safeguard  
35 their officers and training staff. Firearms instructors (FI) are expected to maintain the same  
36 standards as their operational counterparts. This study aimed to quantify the daily  
37 physiological demands placed on FI. **Methods:** 19 FI (45 ± 5 years) completed occupational  
38 tasks whilst wearing heart rate (HR) monitors for a minimum 10 days. VO<sub>2</sub>max testing was  
39 conducted on FI during a treadmill test (TT) and a multistage shuttle test (ST). Linear  
40 regression models were used to model the relationship between VO<sub>2</sub> and HR throughout  
41 the TT. This model was applied to HR data from occupational tasks to infer oxygen  
42 consumption. Repeated Measures ANOVAs were used to compare time spent in VO<sub>2</sub>max  
43 equivalent zones throughout. **Results:** The VO<sub>2</sub>max achieved during ST (45.1 ± 5.6  
44 ml/kg/min) was significantly higher than TT (39 ± 3 ml/kg/min) (p = 0.014). Time to  
45 exhaustion was sooner on ST (06:26 min) compared to TT (13:16 min) (p < .001). FI spent  
46 ~85% of occupational time with an oxygen demand ≤20 ml/kg/min (p < .005). The most  
47 intense occupational tasks saw FI achieve a VO<sub>2</sub>max ≥30 ml/kg/min, but <40 ml/kg/min.  
48 **Conclusion:** Using ST to assess cardiorespiratory fitness resulted in a quicker time to  
49 exhaustion and a higher VO<sub>2</sub>max. Predominantly, FI occupational tasks are low intensity  
50 with sporadic exposures requiring a VO<sub>2</sub>max of >40 ml/kg/min. To safeguard FI from  
51 occupational-related cardiorespiratory or long-term health issues, it is intuitive to suggest  
52 fitness standards should exceed a VO<sub>2</sub>max of 40 ml/kg/min.

53

54 Key words – *Law Enforcement, Exercise test, Cardiorespiratory Fitness, Oxygen*  
55 *Consumption, Aerobic Exercise.*

## 56 INTRODUCTION

57 In recent years, a significant portion of public service personnel, including law enforcement  
58 officers,(1) firefighters,(2,3) paramedics,(4) and military personnel,(5) have globally shown a  
59 reduced level of cardiorespiratory fitness, increased BMI and increased fat free mass.(1–4)  
60 This is partly due to changes in recruitment standards and the concurrent implementation  
61 of human rights legislation with regards to physical standards for employment in 2010.(1,6)  
62 The legislation within the United Kingdom states that employers must be able to defend  
63 physical standards as ‘reasonably necessary to the safe and efficient performance of the job’  
64 and ‘to employ the standards, tests and cut-off scores that adequately capture the  
65 minimum requirements to do a job safely and efficiently’.(6)

66 Throughout their careers, specialist law enforcement officers who train for firearms  
67 operations develop high levels of skill, making employee retention an important focus for  
68 this population. The more experienced and skilled firearms officers become a strong asset to  
69 their forces, contributing to the development and education of new recruits as firearms  
70 instructors (FI), sometimes even after retirement from operational duties. Key elements of  
71 an instructor’s responsibilities include live range teaching and active role play, some of  
72 which can require significant physical effort, all while also instructing and teaching.  
73 Supporting the physical fitness of this group is therefore highly relevant to their  
74 occupational performance, their ability to instruct while under exertion, and to enable their  
75 retention. Heart rate and stress related heart rate variability (HRV); particularly, HRV  
76 derived sympathetic responses have been shown to directly impact shooting accuracy and  
77 success,(7–9) with level of expertise directly impacting cognitive control and timing of shot  
78 with the cardiac rhythm.(10,11) A reduced heart rate during initiating of shooting also  
79 determines the shooter’s ability to control shot timing and accuracy.(11,12) Cardiovascular  
80 fitness is therefore essential to enable FI to maintain a good level of performance, and to  
81 withstand the occupational demands of role play and instruction during officer training,  
82 while also safeguarding their own health.

83 VO<sub>2</sub>max, also known as maximal oxygen carrying capacity, is the gold standard measure of  
84 cardiovascular and pulmonary fitness and reflects one’s ability to sustain specific levels of  
85 physical exertion.(13,14) Cardiorespiratory fitness testing has historically played an integral  
86 part of officer and FI recruitment and is still a key pre-requisite for enrolment and annual  
87 revalidation in many law enforcement settings. The minimum requirements of fitness

88 should be determined based on the demands of operational tasks, to ensure that officers  
89 and FI are able to fulfil their duties without incurring in unnecessary fatigue. Therefore, the  
90 aim of this study was to assess the cardiorespiratory demands placed on FI during law  
91 enforcement officer firearms training, including exertion undertaken during instruction and  
92 during job-related fitness testing.

93

94

95

96

97

98

99

100

101

102

103

104

105

106

107

108

109

110

111

112

113

114

115 **METHODS.**

116 **Study Design**

117 Instructors were voluntarily recruited through internal emails sent via line managers in their  
118 workforce during January and February 2021. A total of 19 FI aged  $45 \pm 5$  years volunteered  
119 to take part (18 male, 1 female). One participant was non-operational and 18 were  
120 operational, of these, 16 (1 female) were armed vehicle response officers (AVRO) and 2  
121 were firearms officers (FO). All participants signed a written informed consent form and a  
122 physical activity readiness questionnaire (PARQ) before participating. The study was  
123 approved by UCL's Ethics Committee (Project ID number: 13985/004) in line with the  
124 declaration of Helsinki.

125 Anthropometric measurements and body composition were taken using a Tanita MC980 MA  
126 (Tanita Cooperation, Tokyo, Japan). In a randomised order, participants then completed two  
127  $VO_2$ max tests. One  $VO_2$ max test was conducted on a treadmill (TT) using the incremental  
128 Bruce treadmill protocol<sup>12,13</sup>, (15,16) commonly considered the gold standard  $VO_2$ max test to  
129 evaluate maximal oxygen consumption. The second  $VO_2$ max test was a 15-meter shuttle  
130 test (ST), (17) which consisted of the volunteers' annual fitness revalidation test and is often  
131 used as a field-based indirect measure of  $VO_2$ max in British law enforcement settings. After  
132 this, all participants recorded their heart rate (HR) for a minimum of 10 days during  
133 occupational firearms instruction activities. The HR data for this period was collected via a  
134 polar chest strap HR monitor (H9, Polar, Kempele, Finland) through the Polar Beat app.

135 **Treadmill  $VO_2$ max procedure**

136 The lab-based  $VO_2$ max test was conducted on a treadmill (h/p/cosmos, Nussdorf, Germany)  
137 using the incremental Bruce treadmill protocol and breath-by-breath analysis with a Vyntus  
138 CPX Metabolic Cart (Vyair Medical, Chicago, USA). (15,16) The incremental protocol  
139 commences with a three-minute warm up walking at 2.7 km/h with no incline. Every three  
140 minutes thereafter, the speed and incline of the treadmill are increased, participants are  
141 verbally encouraged to push themselves to maximal exertion. The test is terminated at  
142 volitional exhaustion, at which point participants walk on no incline at 2.7 km/h until their  
143 HR recovered to under 120 bpm. A test was considered maximal if the participant reached  
144 their predicted maximal heart rate ( $220 - \text{age}$ ), if RER > 1.15 and if a plateau was observed in

145 the VO<sub>2</sub> data. All participants in this study reached these criteria. The anaerobic threshold  
146 was determined using the v-slope method.

#### 147 **15m Shuttle test VO<sub>2</sub>max procedure**

148 In a randomised order, participants also completed a 15m multistage shuttle test (ST) while  
149 wearing a portable breath-by-breath analyser (Metamax 3B, Cortex, Leipzig, Germany).(18)  
150 This was completed indoors to alleviate external environmental influences and required  
151 individuals to repeatedly run back and forth between two markers 15 meters apart in time  
152 with an electronic beep. The ST requires participants to run progressively faster, level one  
153 allowing 6.8 seconds per shuttle, with incremental increases in pace to >4 seconds per  
154 shuttle in the later stages.(18,19) All participants completed to volitional exhaustion with  
155 verbal encouragement.

156

#### 157 **Data Processing**

##### 158 *Treadmill Test*

159 Breath-by-breath VO<sub>2</sub> (ml/kg/min) and HR (bpm) were smoothed to every 7 breaths using  
160 the Vyaire interface and then extracted from the software. To estimate oxygen  
161 requirements during occupation-related tasks, a correlation factor was calculated from the  
162 treadmill test. This was achieved by extracting the correlation equation from a linear  
163 regression plot comparing HR against VO<sub>2</sub> for data collected during the treadmill test.

164

##### 165 *Occupation-related task data*

166 Occupation-related data was collected using the Polar coach module, the most strenuous  
167 session per participant was then downloaded and analysed using the Pandas module for  
168 Python (Python Software Foundation. Python Language Reference, version 3.7. Available  
169 at <http://www.python.org>). HR data from the entirety of the most strenuous session was  
170 correlated to a VO<sub>2</sub> equivalent to provide an estimate of oxygen requirements throughout  
171 the task. Data was then analysed by categorising it into two samples: the highest recorded  
172 value for HR and VO<sub>2</sub> in each minute of the tests, and the highest recorded value for VO<sub>2</sub> in  
173 each HR category. Categories were recorded in 10bpm increments from 50 to 190.

174

175

176

177 *Shuttle test data.*

178 Breath-by-breath VO<sub>2</sub> (ml/kg/min) and HR (bpm) were extracted from the software and  
179 then smoothed to every 7 breaths using Python. Shuttle timings were used to label the data  
180 instance to the appropriate 'Stage: Shuttle' category. Maximum values for HR and VO<sub>2</sub> for  
181 each category, for each participant, were then calculated using pre-built tools from the  
182 Pandas (version 1.04) module for Python.

183

184 *Statistical analysis*

185 The data was analysed using the statistical software SPSS 26 (IBM, New York, USA), with  
186 alpha set at <0.05. All data was normally distributed. Linear regression models were used to  
187 model the relationship between VO<sub>2</sub> and HR for each participant throughout the treadmill  
188 VO<sub>2</sub>max test, as described above. The model was then applied to the polar HR data  
189 collected during job-related tasks to infer oxygen consumption during working hours. Paired  
190 t-tests were used to compare VO<sub>2</sub>max and maximum HR between the treadmill test and  
191 shuttle test. Repeated Measures ANOVAs with Bonferroni post-hoc were used to compare  
192 time spent in VO<sub>2</sub>max equivalent zones within participants. A Mauchley's test of sphericity  
193 was initially carried out to confirm the assumption required to run an ANOVA.

194

195

196

197

198

199

200

201

202

203

204

205 **RESULTS**

206 *Participant Demographics*

207 Participant fitness and anthropometrics are shown in Table 1. Since the female participant's  
208 data did not differ from the mean values of the cohort, male and female data was combined  
209 into one group to safeguard the anonymity of participants' outcomes.

210

211 Table 1. Mean  $\pm$  SD values for anthropometric and fitness data.

| Measure                                          | n  | Mean $\pm$ SD   |
|--------------------------------------------------|----|-----------------|
| <b>Age (years)</b>                               | 19 | 45 $\pm$ 5      |
| <b>Height (cm)</b>                               | 19 | 180.0 $\pm$ 5.7 |
| <b>Weight (kg)</b>                               | 19 | 93.3 $\pm$ 10.3 |
| <b>BMI</b>                                       | 19 | 28.8 $\pm$ 2.4  |
| <b>Fat Free Mass (kg)</b>                        | 18 | 71.3 $\pm$ 7.2  |
| <b>Muscle Mass (kg)</b>                          | 18 | 67.7 $\pm$ 7.0  |
| <b>Body Fat (%)</b>                              | 18 | 23.5 $\pm$ 3.8  |
| <b>Shuttle VO<sub>2</sub>max (ml/kg/min)</b>     | 10 | 45.1 $\pm$ 5.6  |
| <b>Treadmill VO<sub>2</sub>max (ml/kg/min)</b>   | 17 | 39.7 $\pm$ 4.5  |
| <b>Treadmill Anaerobic Threshold (ml/kg/min)</b> | 17 | 24.8 $\pm$ 3.0  |

212

213

214

215

216

217

218

219



220 *Comparison between the treadmill test and the 15m shuttle test*

221 Ten participants completed both the TT and the ST, data from two ST was excluded due to  
222 technical issues. The data presented in this section only relates to those eight participants  
223 who provided completed data on both tests (male = 7; age  $43 \pm 7$  years; height  $177.4 \pm 5.8$   
224 cm; weight  $91.1 \pm 9.4$  kg). The  $VO_2$ max achieved during the ST was significantly higher ( $p =$   
225  $0.014$ ) than that achieved during the TT ( $45.1 \pm 5.6$  ml/kg/min and  $39 \pm 3$  ml/kg/min  
226 respectively) (Figure 1a). There was no correlation between  $VO_2$ max measured during the ST  
227 and  $VO_2$ max measured during the TT (Figure 1b).

228 **(Insert Figure 1 here)**

229 Figure 1. A) Median  $\pm$  IQR  $VO_2$ max measured through the treadmill test and the shuttle test.  
230 \* Significant difference between tests ( $p = .014$ ). B) Relationship between  $VO_2$ max measured through either  
231 test.

232

233 All participants reached exhaustion sooner on the ST, with a total average duration of 13:16  
234 min on the TT and 06:26 min on the ST ( $p < .001$ ). Both heart rate and  $VO_2$  were higher  
235 throughout the ST compared to the TT ( $p < .001$ ) from minute 2 to test termination (Figure  
236 1). However, when comparing  $VO_2$  to HR zones (Figure 2) the difference between tests was  
237 not statistically significant between tests ( $p = 0.068$ ).

238

239 **(Insert Figure 2 here)**

240 Figure 2. Mean  $\pm$  SD heart rate and  $VO_2$  during the treadmill test compared to the shuttle test.  
241 (Note: the dotted lines denote incomplete data, where only participants who reached higher stages are  
242 included)

243

244 Despite a difference in the rate of increase of both  $VO_2$  and HR by time between tests  
245 (Figure 2), when comparing the rise in increase of  $VO_2$  concerning HR zones the difference  
246 was not statistically significant ( $p=0.068$ ) (Figure 3).

247

248 **(Insert Figure 3 here)**

249 Figure 3. Mean  $\pm$  SD rise in  $VO_2$  by heart rate zone during the shuttle test and treadmill test.  
250 (Note: the dotted lines denote incomplete data, where data for heart rate zones higher than 170-180 bpm  
251 include a subsample of participants whose hearts reached higher values)

252

253

254 *Occupation-related physical exertion*

255 Heart rate data was collected during occupational tasks for a total of 18 participants (17  
256 male), with an average of  $16 \pm 9$  instructional days recorded per individual, yielding an  
257 average total duration of  $72.7 \pm 0.5$  hours of data collection per person.

258 Due to the lower variability in the data obtained from the TT compared to the ST, this data  
259 set was used to calculate equivalent  $VO_2$  consumption based on HR, during occupation-  
260 related tasks. The average time spent in equivalent  $VO_2$  zones for the most strenuous  
261 session is represented in Table 2. There was a significant difference observed between the  
262 percentage of time spent in each  $VO_2$  zone ( $F = 16.293$ ,  $p \leq 0.001$ ), where participants spent  
263 the majority of their time working at or below an oxygen demand of 20 ml/kg/min.

264

265 Table 2. Percentage of time spent in  $VO_{2max}$  equivalent zones.

| FO (n) | AVRO (n) | $VO_2$ equivalent zones (ml/kg/min) | Percentage of wearing time per zone during the most strenuous session (%) | Average duration spent in each zone during the most strenuous session (mean $\pm$ SD) hours:minutes:seconds |
|--------|----------|-------------------------------------|---------------------------------------------------------------------------|-------------------------------------------------------------------------------------------------------------|
| 2      | 16       | <5                                  | 4                                                                         | 00:28:12 $\pm$ 00:26:49                                                                                     |
| 2      | 16       | 5-10                                | 35 *                                                                      | 02:59:58 $\pm$ 02:34:33                                                                                     |
| 2      | 16       | 10-15                               | 35 *                                                                      | 02:25:01 $\pm$ 01:51:45                                                                                     |
| 2      | 16       | 15-20                               | 11 *                                                                      | 00:29:42 $\pm$ 00:32:20                                                                                     |
| 2      | 16       | 20-25                               | 4                                                                         | 00:07:10 $\pm$ 00:05:31                                                                                     |
|        | 16       | 25-30                               | 4                                                                         | 00:06:30 $\pm$ 00:08:39                                                                                     |
|        | 16       | 30-35                               | 4                                                                         | 00:04:21 $\pm$ 00:03:52                                                                                     |
|        | 16       | 35-40                               | 2                                                                         | 00:01:36 $\pm$ 00:01:45                                                                                     |

266 \* Indicates a significant difference between time spent in between 5-20 ml/kg/min compared to above 20 ( $p <$   
267 0.05).

268

269 Of the 18 participants, all delivered FO training, and 16 of these also (15 male) delivered  
270 AVRO training. The 16 AVRO instructors reached oxygen demand levels beyond 30

271 ml/kg/min, only while training AVROs. Instructors who delivered FO training did not exceed  
272 an oxygen demand of 30 ml/kg/min during sessions, while instructors delivering AVRO  
273 training worked at higher intensities than 30 ml/kg/min but did not exceed 40 ml/kg/min.

274

## 275 **Discussion**

276 This study identified the maximal oxygen demand ( $VO_2\text{max}$ ) obtained during two  
277 incremental tests (the 15m shuttle test and the Bruce treadmill test). The TT  $VO_2\text{max}$  was  
278 used to determine the level of cardiorespiratory exertion that firearms instructors undergo  
279 when delivering operational firearms training. The main findings of this study suggest that  
280 instructing Firearms officers demands an oxygen consumption of up to 30 ml/kg/min,  
281 instructing armed vehicle response officers demands an oxygen consumption of up to 40  
282 ml/kg/min, and that the 15m shuttle test (ST) is more physically demanding than the  
283 treadmill test(TT).

284

### 285 *Comparison of the shuttle test with the treadmill test*

286 Optimal cardiovascular fitness is a key requirement for safeguarding health and promoting  
287 effective performance in law enforcement. The ST is a practical field-based test, typically  
288 administered with the assumption that specific stages of the test equate to estimated levels  
289 of  $VO_2\text{max}$ . (19,20) In this study, the ST resulted in significantly higher peak oxygen demands  
290 compared to the TT. This falls in line with Morris et al.(21) findings, where measured  
291  $VO_2\text{max}$  during the ST was higher than the estimations provided by Brewer (22) (Table 3).

292

293 Table 3. Estimated and measured  $VO_2$  equivalents per each end stage of the 15m shuttle test.

| Level: Shuttle | Estimated $VO_2$<br>(ml.kg-1.min <sup>-1</sup> )<br>(Brewer, 2010) | Measured $VO_2$<br>(ml.kg-1.min <sup>-1</sup> )<br>(Morris et al., 2020) | Measured $VO_2$<br>(ml.kg-1.min <sup>-1</sup> )<br>(Current study) |
|----------------|--------------------------------------------------------------------|--------------------------------------------------------------------------|--------------------------------------------------------------------|
| 5:4            | 35                                                                 | 40.4 ± 4.8                                                               | 42.4 ± 4.9                                                         |
| 7:6            | 41                                                                 | 46.8 ± 5.8                                                               | 48.6 ± 5.2                                                         |
| 9:4            | 46                                                                 | 52.1 ± 7.2                                                               | 49.4                                                               |
| 10:5           | 51                                                                 | 55.3 ± 6.5                                                               | -                                                                  |

294

295

296 This information indicates that the ST is a more strenuous test than the TT, where  
297 participants present a higher oxygen demand on the ST and reach exhaustion sooner. This is  
298 likely due to the higher physical requirements of constant changes in direction on the ST.  
299 The TT involves continuous linear running and is therefore primarily reliant on endurance  
300 qualities, while the ST requires regular change of direction, adding a reliance on agility,  
301 eccentric forces to decelerate, and explosive concentric force to accelerate. The increased  
302 oxygen demand during the ST is therefore almost certainly due to the nature of musculature  
303 loading during deceleration and change of direction, with greater angles of change of  
304 direction requiring a greater muscle activation.(20) As a result, the change of direction  
305 increases the metabolic cost of task, resulting in higher cardiovascular requirements.(23)  
306 These increases in muscle activation and metabolic cost have been shown to be further  
307 impacted by an individual's lower body strength and power.(24) Additionally a 180-degree  
308 change of direction is further impacted by co-ordination and test familiarity, causing a high  
309 degree of variability in test outcome.(19) This is reflected in the results presented here,  
310 where there was no correlation between the VO<sub>2</sub>max obtained on the two tests, indicating  
311 that, although the ST consistently produced higher values, there was no defined ratio to this  
312 relationship. Therefore, ST might be best used to provide a VO<sub>2</sub>max predictive range rather  
313 than a definitive VO<sub>2</sub>max per stage reached.(19,25)

314 Measuring VO<sub>2</sub>max on a treadmill presents a progressive test with less variability and less  
315 strain on the lower limbs, providing a more accurate estimate and reducing the risk of  
316 injury.(15,16,26) Therefore, if the intention is to purely obtain a measure of cardiovascular  
317 fitness, an ergometer test (eg. treadmill or bike) provides a more reliable direct measure of  
318 VO<sub>2</sub>max. If, however, the intention is to measure a more complex fitness ability which  
319 includes cardiovascular fitness, lower limb power, acceleration and agility, a ST could be  
320 more appropriate.

321 This study concentrated purely on the cardiopulmonary demands of delivering training to  
322 law enforcement firearms instructors, therefore, any mention of VO<sub>2</sub> hereafter will be made  
323 in reference to values obtained through the TT, as this is the more reliable measure of  
324 cardiovascular fitness.

325

326 *Physical requirements of occupation-related tasks*

327 FI spent most of their most strenuous day at or below 20 ml/kg/min. However, it should be  
328 noted that a significant amount of time ( $7:10 \pm 5:30$  minutes) was spent between 20-25  
329 ml/kg/min. To be able to sustain this workload without the detrimental accumulation of  
330 fatigue, a minimum anaerobic threshold of 25 ml/kg/min could be recommended.  
331 Measuring an anaerobic threshold requires expensive equipment, while  $VO_2$ max can be  
332 estimated using indirect tests. Given that the ratio of anaerobic threshold to  $VO_2$ max in the  
333 general population is typically between 55 - 65%,(27,28) a minimum  $VO_2$ max between 38.5  
334 – 45.5 ml/kg/min would therefore be required to sustain this level of effort without  
335 incurring excessive fatigue. This would put individuals in the best position to sustain the  
336 delivery of firearms training courses with minimal cardiovascular strain. (28–31) It should  
337 also be considered that a “good” rating in cardiorespiratory fitness ranges from 36-56  
338 ml/kg/min for 18-55-year-old females and 40-60 ml/kg/min for males (See ACSM, 2014 for a  
339 detailed table of normative values).(28) Good cardiorespiratory function is crucial to  
340 safeguard general health and reduce the risk of coronary heart disease, myocardial  
341 infarction and overall mortality, where values below 28 ml/kg/min present a significantly  
342 greater risk of these incidents. (29–31) It is also worth noting that higher cardiorespiratory  
343 fitness is associated with improved cognitive function and motor processes through  
344 ageing,(32) which also allows for greater control of the timing of shot with cardiac rhythm,  
345 improved shot success, decision-making, alertness and memory.(7–12)

346 When delivering FO training, instructors did not exceed an oxygen demand of 30 ml/kg/min.  
347 AVRO training was more demanding, where instructors sustained a small but meaningful  
348 period ( $1:36 \pm 1:45$  minutes) between 35-40 ml/kg/min of equivalent  $VO_2$ , which  
349 approaches maximal intensities for some participants included in this study. Assuming FI  
350 should not be working at their maximal physical capacity while instructing others, it should  
351 be strongly recommended that these FI should hold a  $VO_2$ max that exceeds this bracket.

352 Therefore, taking into consideration a required anaerobic threshold of 25 ml/kg/min, FI who  
353 only train FOs could be recommended to have a  $VO_2$ max that exceeds 38.5 ml/kg/min.  
354 However, considering the significantly greater physical demands of AVRO training,  
355 instructors who train these officers could be recommended to have a  $VO_2$ max that  
356 noticeably exceeds 40 ml/kg/min. It is important to note here that these measurements  
357 only relate to the physical demands placed on instructors while training other law

358 enforcement officers, they do not relate to the fulfilment of real-life operational tasks,  
359 which are highly likely to exceed these demands.

360

361

### 362 *Cardiovascular exercise recommendations*

363 Utilising a multi-modal approach of cardiovascular exercise prescription seems to suggest  
364 the greatest long-term yield for adaptation not only for the cardiovascular system but also  
365 for body composition.(33–35) This would include a comprehensive strategy to train  
366 physiological outputs that would improve centrally driven factors such as cardiac output and  
367 stroke volume,(36–38) concurrently with stimuli that would cause peripheral adaptations  
368 such as mitochondrial biogenesis, upregulation of capillary density and A-VO<sub>2</sub> difference,  
369 and thus improving VO<sub>2</sub>max and reducing body fat percentage.(33–38) This involves the  
370 concurrent prescription of steady-state continuous effort exercise (SS), high-intensity  
371 interval training (HIIT) and sprint interval (SI) exercise. Evidence suggests that an 8-week 2-  
372 3x per week HIIT program will start to elicit cardiovascular central adaptations to improve  
373 VO<sub>2</sub>max but at the cost of reduced enjoyment and increased discomfort when compared to  
374 SS training.(33,39) This alone may put individuals off its completion, furthermore, peripheral  
375 and body composition adaptations were not seen until 12 weeks, aligned with the  
376 adaptations of SS training.(33–39) Alone HIIT or SI training did not display any greater  
377 physiological adaptations long term when compared to SS, except for a minor increase in  
378 lean muscle mass for SI compared to SS.(33) Thus, the concurrent prescription of all three  
379 modalities across a 12+ week training program is postulated to simultaneously improve  
380 central, peripheral and body composition adaptations. This will also reduce training  
381 monotony, which is a major limiting factor for training participation. (40) Therefore, a 2-3x  
382 per week 12-week training program that mixes SS, HIIT and SI with a focus on long-term  
383 physiological and body composition adaptations, whilst keeping sessions enjoyable, should  
384 be emphasised to minimise long-term cardiorespiratory illness in the more senior FI.

385

### 386 **Limitations and further research**

387 The sample size of the study was limited due to access to a small specialist population,  
388 where data was also lost due to participants being called on operation while being tested.

389 This study focused on cardiorespiratory requirements only; it did not investigate other  
390 physical requirements needed to safeguard FI from injury during role-playing, resistance and  
391 restrain scenarios. Strength and power are key requirements to many armed operational  
392 tasks and should also be considered when assessing the physical burden of instructor and  
393 officer training. An enquiry into the prevalence of musculoskeletal injuries obtained during  
394 firearms drills could also provide an understanding of injury risk in this population, enabling  
395 the development of risk reduction strategies.

396 It should be underlined that these results apply to males but may not necessarily apply to  
397 females. The data set only included one female; even though this participant's values  
398 matched the average values obtained by the wider male cohort, one person is not  
399 representative of the wider female population. Further research focused on female firearms  
400 instructors is required to ensure that recommended values are appropriate to either  
401 gender.

402 Finally, these results apply to instructors delivering training, but not to real-life operational  
403 tasks. A similar enquiry on cardiorespiratory demands of operational firearms tasks could  
404 provide valuable insight into the demands of specialist officers to inform fitness testing  
405 requirements in this cohort.

406

## 407 **Conclusions**

408 A comparison of the oxygen demands of the treadmill test and shuttle test suggested that  
409 the shuttle test provides more variable results, due to greater demands of motor control,  
410 agility and explosive strength. Therefore, a treadmill test appears to provide a more  
411 accurate evaluation of cardiorespiratory fitness, while a shuttle test may provide a more  
412 global assessment of cardiorespiratory fitness, lower limb power and agility together. Using  
413 the outputs from the treadmill test to estimate cardio-pulmonary demands of occupational  
414 tasks, the results indicate that FI reached oxygen demands of 30 ml/kg/min when training  
415 AROs, however, this oxygen demand may reach 40 ml/kg/min when training AVROs.  
416 Therefore, FI requires high levels of cardiorespiratory fitness to withstand the physical  
417 demands of the task. This indicates that highly experienced FI should continue to maintain  
418 levels of fitness that exceed a  $VO_{2max}$  of 40 ml/kg/min even after becoming non-

419 operational, allowing the effective delivery of training and safeguarding their long-term  
420 health.

421

#### 422 *Acknowledgements*

423 We thank Justin Dixon for comments on the manuscript and Derek Brooks for organisation  
424 and logistics, making scheduling around operational shifts, work-related requirements, and  
425 facilities a harmonious process.

#### 426 *Funding statement:*

427 This research received funding from the metropolitan police service.

#### 428 *Data availability statement:*

429 Data can be requested from the corresponding author upon reasonable request.

430

#### 431 **REFERENCES**

- 432 1. Sergi TE, Bode KB, Hildebrand DA, Dawes JJ, Joyce JM. Relationship between Body Mass Index  
433 and Health and Occupational Performance among Law Enforcement Officers, Firefighters,  
434 and Military Personnel: A Systematic Review. *Curr Dev Nutr*. 2023 Jan;7(1):100020.
- 435 2. Munir F, Clemes S, Houdmont J, Randall R. Overweight and obesity in UK firefighters. *Occup*  
436 *Med (Chic Ill)*. 2012 Jul 5;62(5):362–5.
- 437 3. Lessons GR, Bhakta D, McCarthy D. Development of muscle mass and body fat reference  
438 curves for white male UK firefighters. *Int Arch Occup Environ Health*. 2022 May 1;95(4):779–  
439 90.
- 440 4. Hunter J, Sheridan A, High S, Waite. Paramedic strength and flexibility: findings of a 6-month  
441 workplace exercise randomised controlled trial [Internet]. Vancouver; 2019 Aug. Available  
442 from: <https://researchoutput.csu.edu.au>
- 443 5. Robinson M, Siddall A, Bilzon J, Thompson D, Greeves J, Izzard R, et al. Low fitness, low body  
444 mass and prior injury predict injury risk during military recruit training: a prospective cohort  
445 study in the British Army. *BMJ Open Sport Exerc Med*. 2016 May 9;2(1):e000100.
- 446 6. Adams EM. Human rights at work: Physical standards for employment and human rights law.  
447 *Applied Physiology, Nutrition, and Metabolism*. 2016 Jun;41(6 (Suppl. 2)):S63–73.
- 448 7. Thompson AG, Swain DP, Branch JD, Spina RJ, Grieco CR. Autonomic Response to Tactical  
449 Pistol Performance Measured by Heart Rate Variability. *J Strength Cond Res*. 2015  
450 Apr;29(4):926–33.
- 451 8. Nieuwenhuys A, Oudejans RRD. Effects of anxiety on handgun shooting behavior of police  
452 officers: a pilot study. *Anxiety Stress Coping*. 2010 Mar;23(2):225–33.



- 453 9. Ortega E, Wang CJK. Pre-performance Physiological State: Heart Rate Variability as a  
454 Predictor of Shooting Performance. *Appl Psychophysiol Biofeedback*. 2018 Mar 10;43(1):75–  
455 85.
- 456 10. Doppelmayr M, Finkenzeller T, Sauseng P. Frontal midline theta in the pre-shot phase of rifle  
457 shooting: Differences between experts and novices. *Neuropsychologia*. 2008;46(5):1463–7.
- 458 11. Gallicchio G, Finkenzeller T, Sattlecker G, Lindinger S, Hoedlmoser K. The influence of physical  
459 exercise on the relation between the phase of cardiac cycle and shooting accuracy in  
460 biathlon. *Eur J Sport Sci*. 2019 May 28;19(5):567–75.
- 461 12. Helin P, Sihvonen T, Hanninen O. Timing of the triggering action of shooting in relation to the  
462 cardiac cycle. *Br J Sports Med*. 1987 Mar 1;21(1):33–6.
- 463 13. Saltin B, Calbet JAL. Point: In health and in a normoxic environment,  $\dot{V}_{O_2 \max}$  is  
464 limited primarily by cardiac output and locomotor muscle blood flow. *J Appl Physiol*. 2006  
465 Feb;100(2):744–8.
- 466 14. Strasser B. Survival of the fittest VO<sub>2</sub> sub 2 sub max a key predictor of longevity. *Frontiers in*  
467 *Bioscience*. 2018;23(8):4657.
- 468 15. Bruce RA, Pearson R, Lovejoy FW, Yu PNG, Brothers GB. VARIABILITY OF RESPIRATORY AND  
469 CIRCULATORY PERFORMANCE DURING STANDARDIZED EXERCISE 1. *Journal of Clinical*  
470 *Investigation*. 1949 Nov 1;28(6 Pt 2):1431–8.
- 471 16. Stork M, Novak J, Zeman V. CARDIOPULMONARY EXERCISE TESTING FOR VO<sub>2</sub> MAX  
472 DETERMINING IN SUBJECTS OF DIFFERENT PHYSICAL ACTIVITY. 2016;46(4):91–101.
- 473 17. Birks A. Validity and reliability of a modified version of the Chester Treadmill Walking Test  
474 (Police) as an alternative to the 15-Metre Multi-Stage Police Fitness Test [Internet]. Available  
475 from: <http://hdl.handle.net/10034/620305>
- 476 18. Manser A. Physiological responses during performance of the 15-metre Multistage Shuttle  
477 Run Test (15mMSFT), with reference to the Police Fitness Standards [Internet]. 2019.  
478 Available from: <http://hdl.handle.net/10034/623169>
- 479 19. Ramsbottom R, Brewer J, Williams C. A progressive shuttle run test to estimate maximal  
480 oxygen uptake. *Br J Sports Med*. 1988 Dec 1;22(4):141–4.
- 481 20. Hader K, Mendez-Villanueva A, Palazzi D, Ahmaidi S, Buchheit M. Metabolic Power  
482 Requirement of Change of Direction Speed in Young Soccer Players: Not All Is What It Seems.  
483 *PLoS One*. 2016 Mar 1;11(3):e0149839.
- 484 21. Morris M, Deery E, Sykes K. Chester treadmill police tests as alternatives to 15-m shuttle  
485 running. *Occup Med (Chic Ill)* [Internet]. 2019 Apr 13;69(2):133–8. Available from:  
486 <https://academic.oup.com/occmed/article/69/2/133/5425548>
- 487 22. Brewer J, Morgan N, Breivik S, Dyer A, Harmer D. Job Related Fitness Tests for Police Officer  
488 Specialist Posts [Internet]. Report. Fitness Working Group. National Police Improvement  
489 Agency. United Kingdom. United Kingdom; 2010 [cited 2022 Nov 28]. Available from:  
490 [https://assets.college.police.uk/s3fs-public/2020-11/fwg\\_report\\_final\\_1.pdf](https://assets.college.police.uk/s3fs-public/2020-11/fwg_report_final_1.pdf)
- 491 23. Zagatto AM, Ardigo LP, Barbieri FA, Milioni F, dello Iacono A, Camargo BHF, et al.  
492 Performance and Metabolic Demand of a New Repeated-Sprint Ability Test in Basketball  
493 Players: Does the Number of Changes of Direction Matter? *J Strength Cond Res*. 2017  
494 Sep;31(9):2438–46.

- 495 24. Kozinc Ž, Smajla D, Šarabon N. The relationship between lower limb maximal and explosive  
496 strength and change of direction ability: Comparison of basketball and tennis players, and  
497 long-distance runners. *PLoS One*. 2021 Aug 18;16(8):e0256347.
- 498 25. Kour Buttar K, Saboo N, Kacker S. A review: Maximal oxygen uptake (VO<sub>2</sub> max) and its  
499 estimation methods Prediabetic project View project Effect of Integrated Approach of Yoga  
500 Therapy On Carotid Intima Media Thickness, Heart Rate Variability & Biochemical Parameters  
501 in Prediabetes View project [Internet]. 2019. Available from:  
502 <https://www.researchgate.net/publication/344122808>
- 503 26. Albouaini K, Egred M, Alahmar A, Wright DJ. Cardiopulmonary exercise testing and its  
504 application. *Postgrad Med J*. 2007 Nov 1;83(985):675–82.
- 505 27. Davis JA, Storer TW, Caiozzo VJ. Prediction of normal values for lactate threshold estimated  
506 by gas exchange in men and women. *Eur J Appl Physiol*. 1997 Jul 1;76(2):157–64.
- 507 28. Thompson PD, Arena R, Riebe D, Pescatello LS. ACSM's New Preparticipation Health  
508 Screening Recommendations from ACSM's Guidelines for Exercise Testing and Prescription,  
509 Ninth Edition. *Curr Sports Med Rep*. 2013;12(4):215–7.
- 510 29. Sven G, Koch B, Ittermann T, Christoph S, Marcus D, Felix SB, et al. Influence of age, sex, body  
511 size, smoking, and  $\beta$  blockade on key gas exchange exercise parameters in an adult  
512 population. *European Journal of Cardiovascular Prevention & Rehabilitation*. 2010  
513 Aug;17(4):469–76.
- 514 30. Valkeinen H, Aaltonen S, Kujala UM. Effects of exercise training on oxygen uptake in coronary  
515 heart disease: a systematic review and meta-analysis. *Scand J Med Sci Sports*. 2010  
516 Aug;20(4):545–55.
- 517 31. Kodama S. Cardiorespiratory Fitness as a Quantitative Predictor of All-Cause Mortality and  
518 Cardiovascular Events in Healthy Men and Women. *JAMA*. 2009 May 20;301(19):2024.
- 519 32. HILLMAN CH, WEISS EP, HAGBERG JM, HATFIELD BD. The relationship of age and  
520 cardiovascular fitness to cognitive and motor processes. *Psychophysiology*. 2002  
521 May;39(3):S0048577201393058.
- 522 33. Langan SP, Grosicki GJ. Exercise Is Medicine...and the Dose Matters. *Front Physiol*. 2021 May  
523 12;12.
- 524 34. Bækkerud FH, Solberg F, Leinan IM, Wisløff U, Karlsen T, Rognmo Ø. Comparison of Three  
525 Popular Exercise Modalities on V'O<sub>2</sub>max in Overweight and Obese. *Med Sci Sports Exerc*.  
526 2016 Mar;48(3):491–8.
- 527 35. Gerosa-Neto J, Panissa VLG, Monteiro PA, Inoue DS, Ribeiro JPI, Figueiredo C, et al. High- or  
528 moderate-intensity training promotes change in cardiorespiratory fitness, but not visceral fat,  
529 in obese men: A randomised trial of equal energy expenditure exercise. *Respir Physiol  
530 Neurobiol*. 2019 Aug;266:150–5.
- 531 36. HELGERUD J, HØYDAL K, WANG E, KARLSEN T, BERG P, BJERKAAS M, et al. Aerobic High-  
532 Intensity Intervals Improve V'O<sub>2</sub>max More Than Moderate Training. *Med Sci Sports Exerc*.  
533 2007 Apr;39(4):665–71.
- 534 37. Milanović Z, Sporiš G, Weston M. Effectiveness of High-Intensity Interval Training (HIT) and  
535 Continuous Endurance Training for VO<sub>2</sub>max Improvements: A Systematic Review and Meta-  
536 Analysis of Controlled Trials. *Sports Med*. 2015 Oct;45(10):1469–81.

- 537 38. ZHOU B, CONLEE RK, JENSEN R, FELLINGHAM GW, GEORGE JD, GARTH FISHER A. Stroke  
538 volume does not plateau during graded exercise in elite male distance runners. Med Sci  
539 Sports Exerc. 2001 Nov;33(11):1849–54.
- 540 39. Burgomaster KA, Howarth KR, Phillips SM, Rakobowchuk M, MacDonald MJ, McGee SL, et al.  
541 Similar metabolic adaptations during exercise after low volume sprint interval and traditional  
542 endurance training in humans. J Physiol. 2008 Jan 1;586(1):151–60.
- 543 40. Oliveira R, Martins A, Nobari H, Nalha M, Mendes B, Clemente FM, et al. In-season monotony,  
544 strain and acute/chronic workload of perceived exertion, global positioning system running  
545 based variables between player positions of a top elite soccer team. BMC Sports Sci Med  
546 Rehabil. 2021 Dec 12;13(1):126.
- 547



$\dot{V}O_{2max}$  (ml/kg/min)

A

■  $\dot{V}O_2$  Max - Treadmill ■  $\dot{V}O_2$  Max - Shuttle

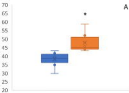

Treadmill  $\dot{V}O_{2max}$  (ml/kg/min)

B

Shuttle  $\dot{V}O_{2max}$  (ml/kg/min)

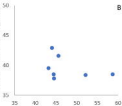

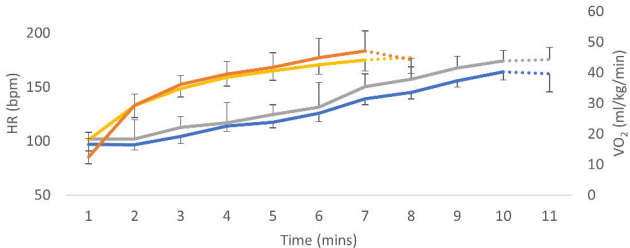

— Treadmill HR

— Shuttle HR

— Treadmill VO<sub>2</sub>

— Shuttle VO<sub>2</sub>

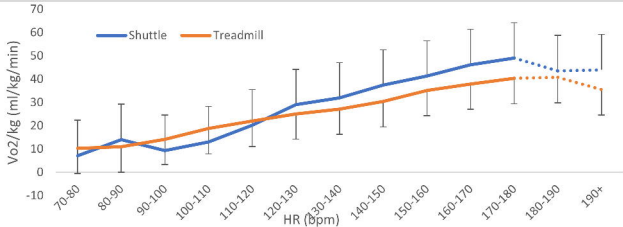

Source: https://www.medrxiv.org/content/10.1101/2024.02.27.24303347v1.full.pdf
